# Supplementary material for: Water-soluble o-hydroxycinnamate as an efficient photoremovable protecting group of alcohols with fluorescence reporting
Source: Royal Society of Chemistry journal article supplement (doi:10.1039/c2pp05309h), 2012-02-14

## Electronic Supplementary Information for

# Water soluble *o*-hydroxy cinnamate as an efficient photoremovable protecting group of alcohols with fluorescence reporting

Xue-You Duan, Bao-Chang Zhai, Qin-Hua Song

*Department of Chemistry, University of Science and Technology of China, Hefei 230026, P. R. China.*

### Table of Contents

Copies of  $^1\text{H}$  NMR and  $^{13}\text{C}$  NMR spectra of compounds **3–8**, **1** and **2**

**Figure S1.**  $^1\text{H}$  NMR spectra of **3**

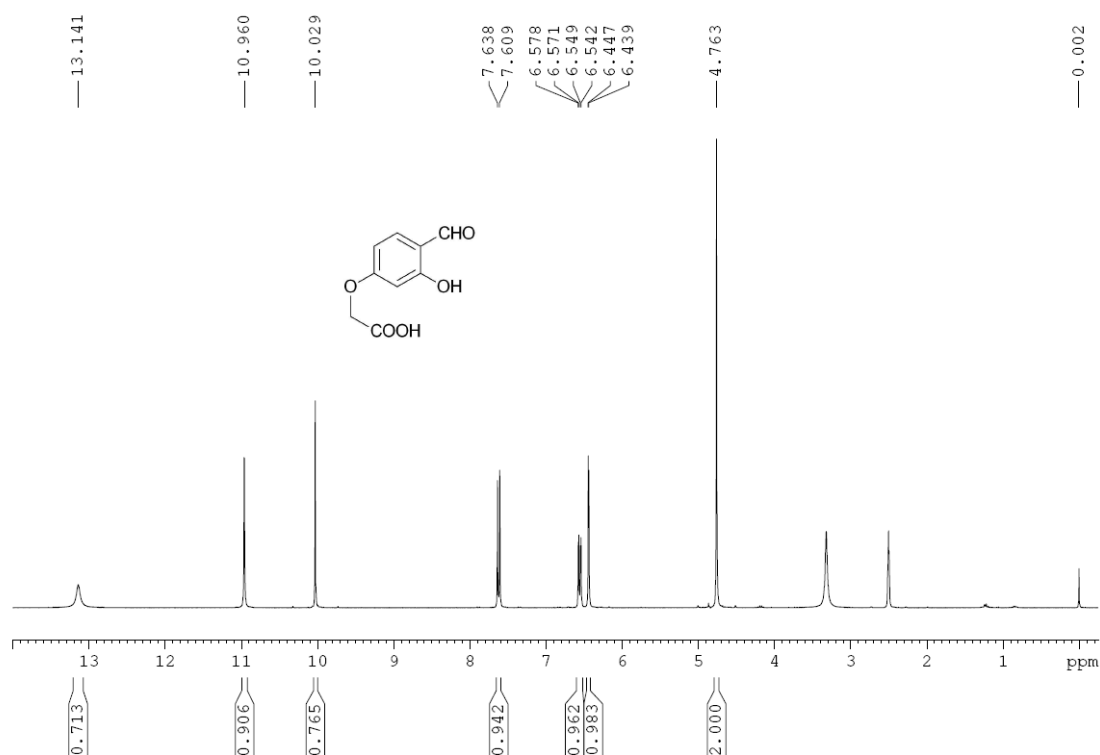

**Figure S2.**  $^1\text{H}$  NMR spectra of **4**

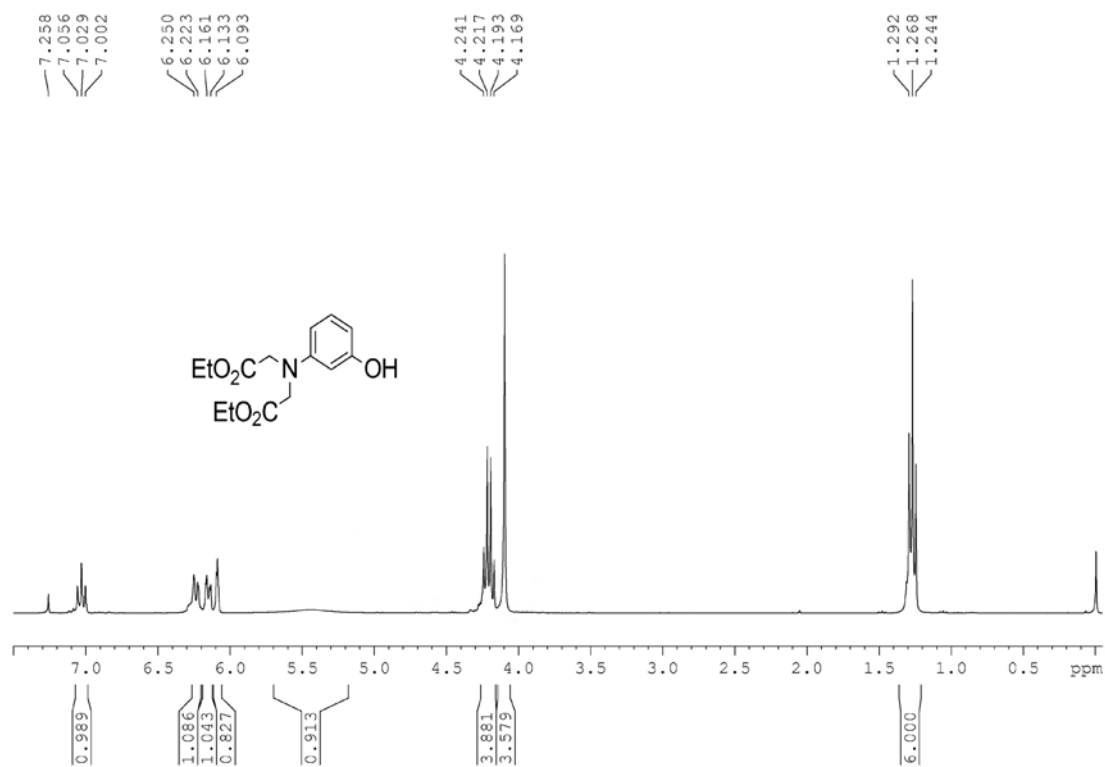

Figure S3. <sup>1</sup>H NMR spectra of 5

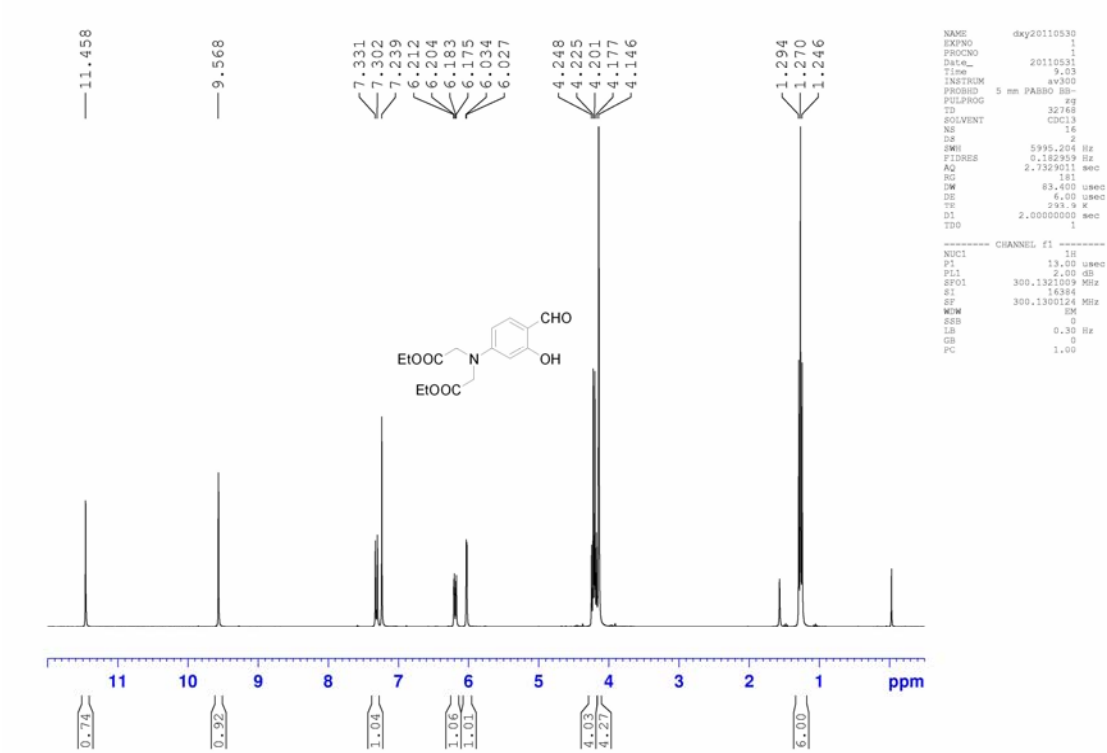

**Figure S4.**  $^1\text{H}$  NMR and  $^{13}\text{C}$  NMR spectra of **6**

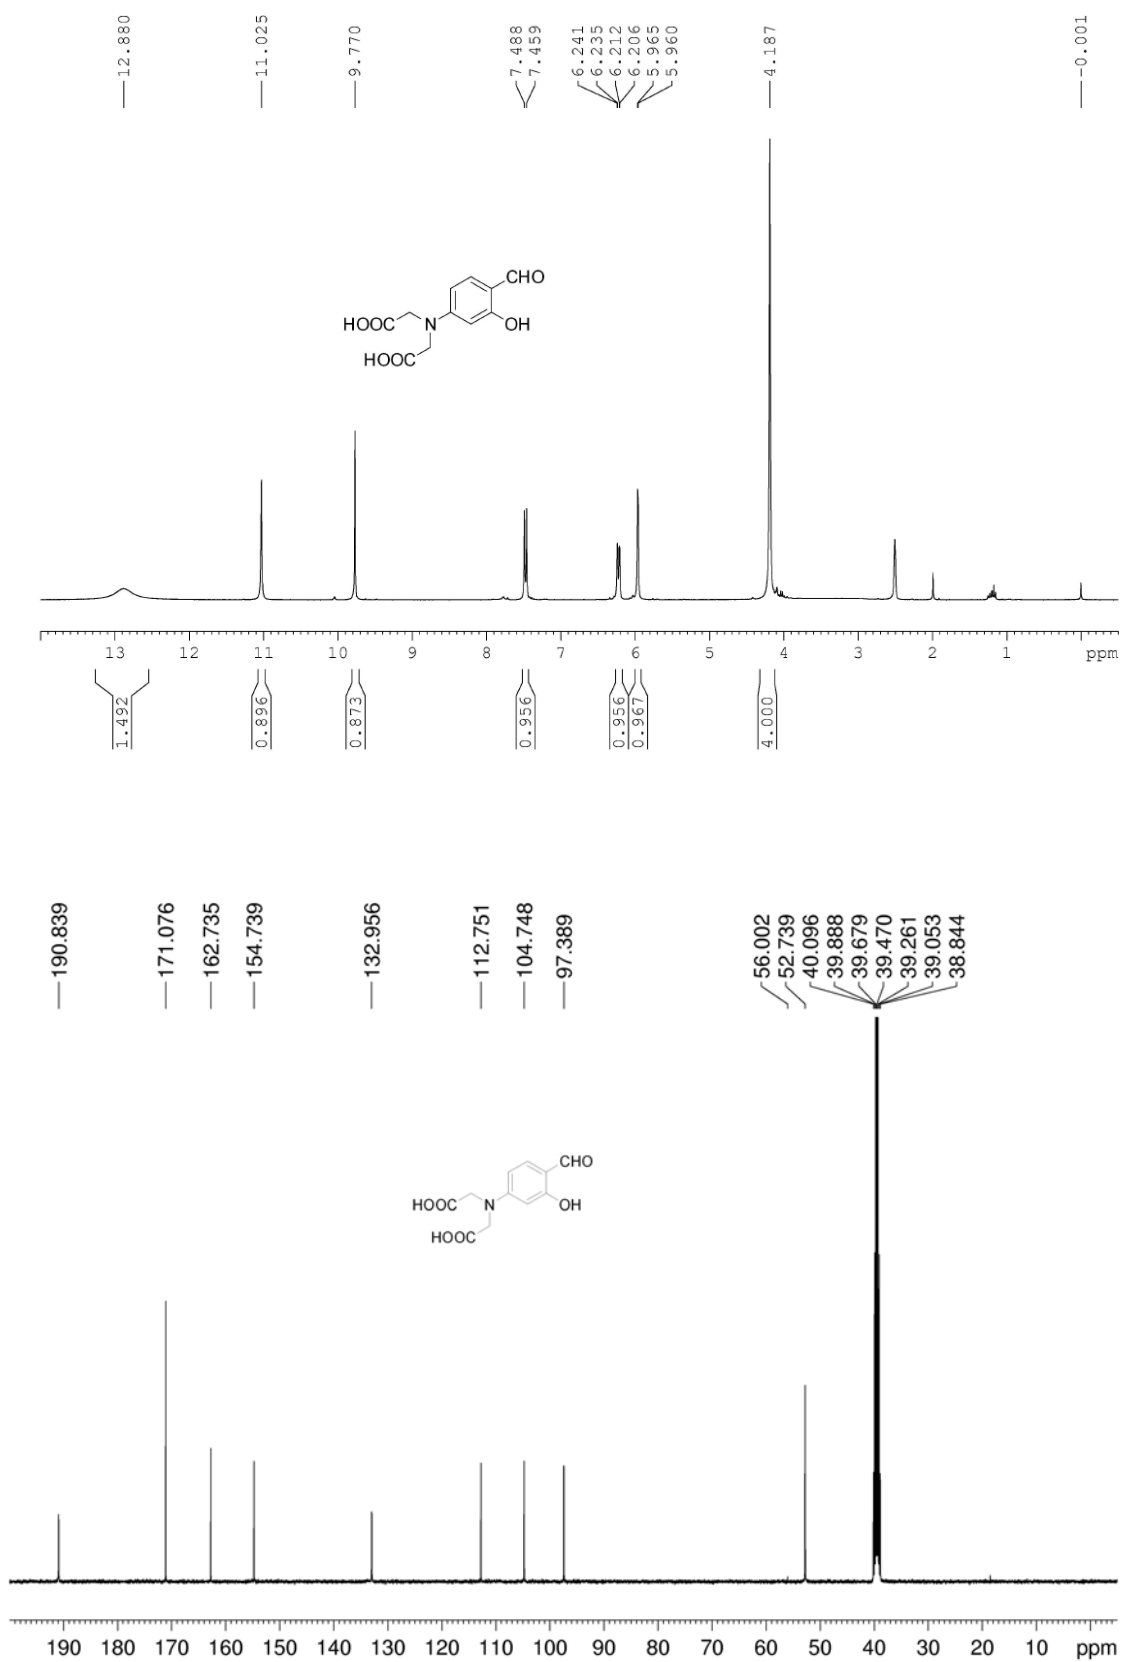

**Figure S5.**  $^1\text{H}$  NMR spectra of **8**

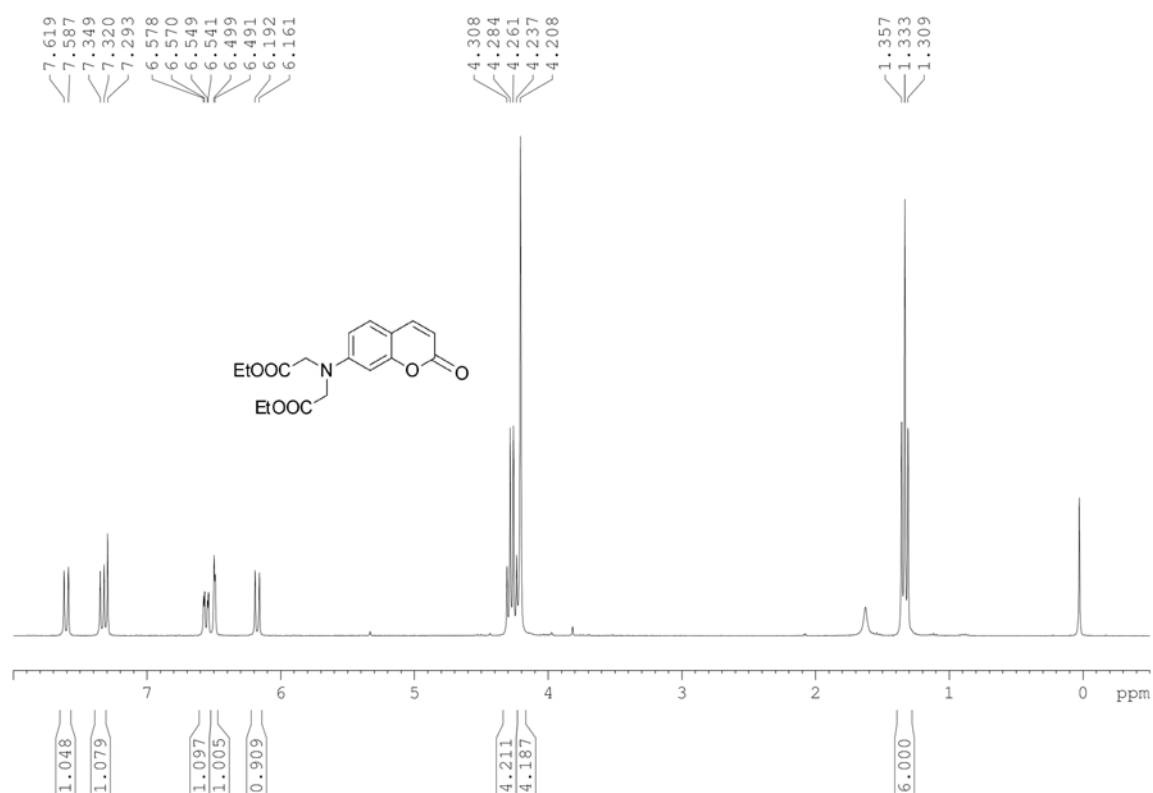

**Figure S6.**  $^1\text{H}$  NMR and  $^{13}\text{C}$  NMR spectra of **1a**

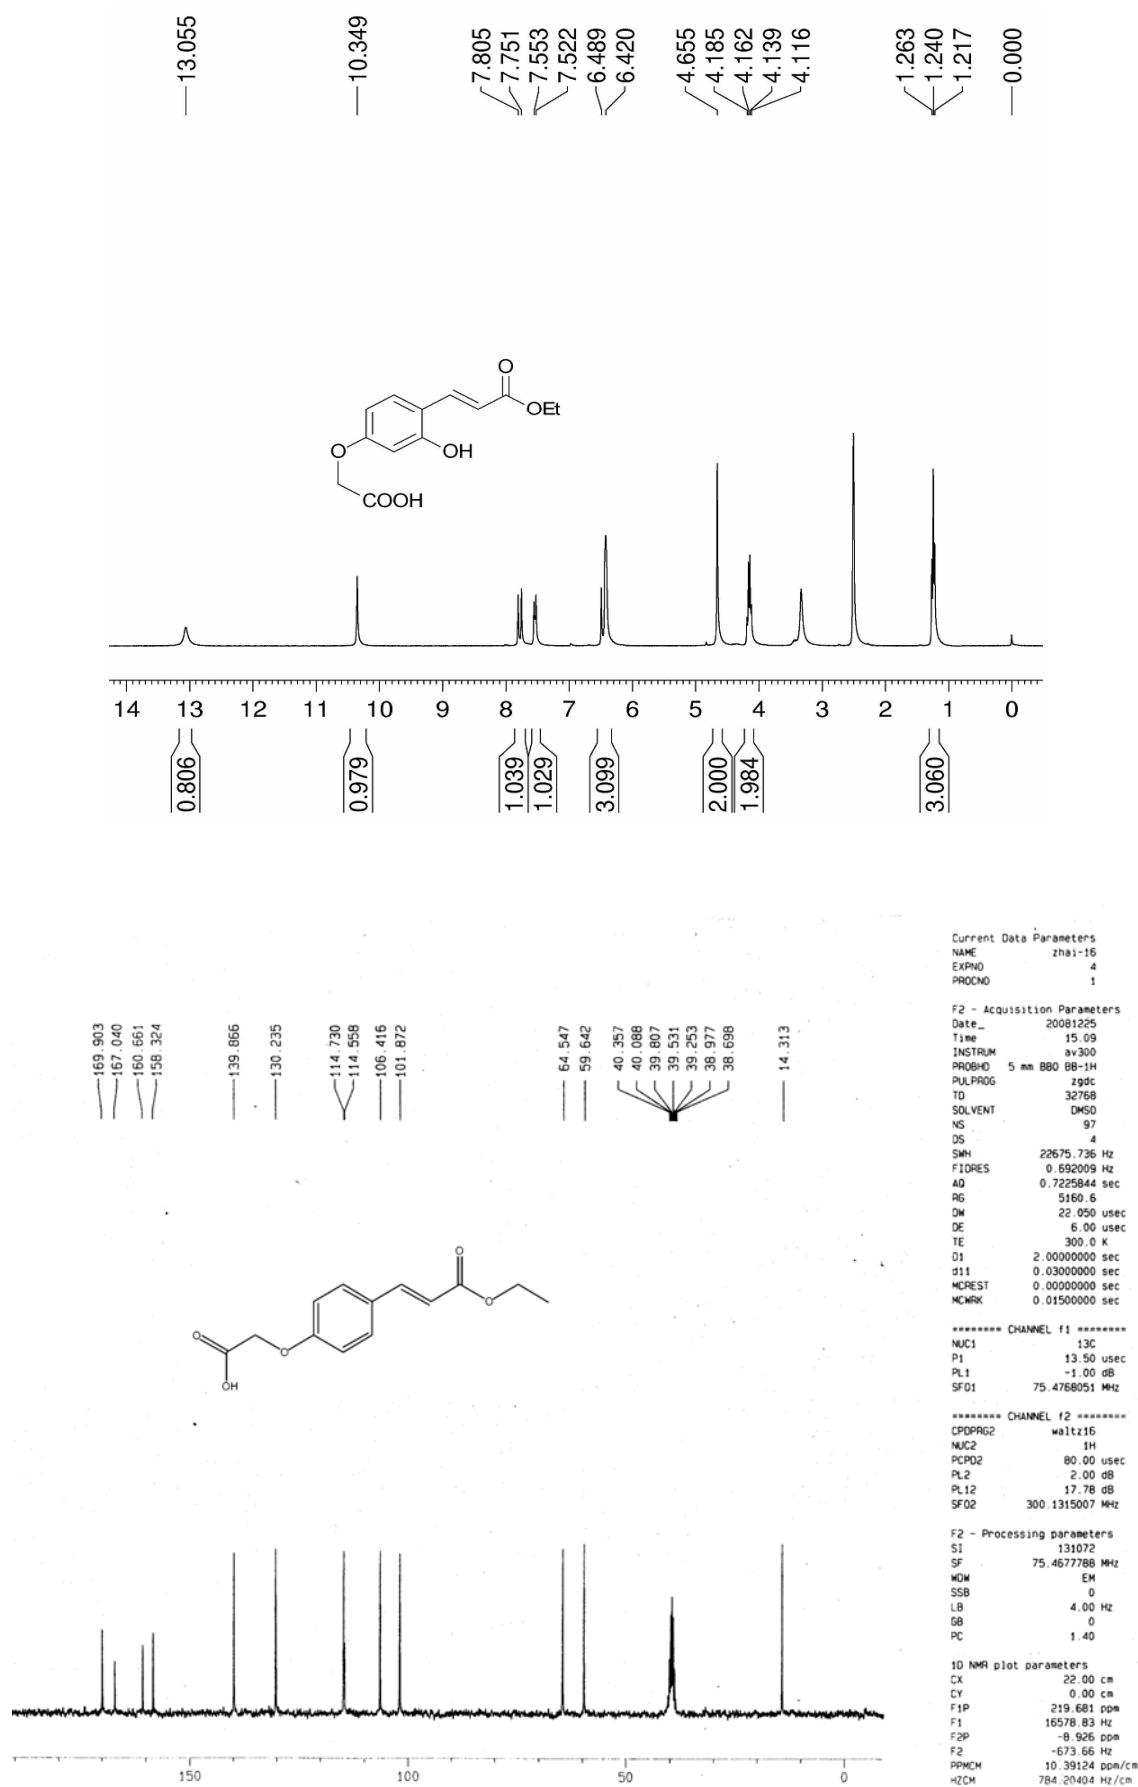

Figure S7. <sup>1</sup>H NMR and <sup>13</sup>C NMR spectra of 2a

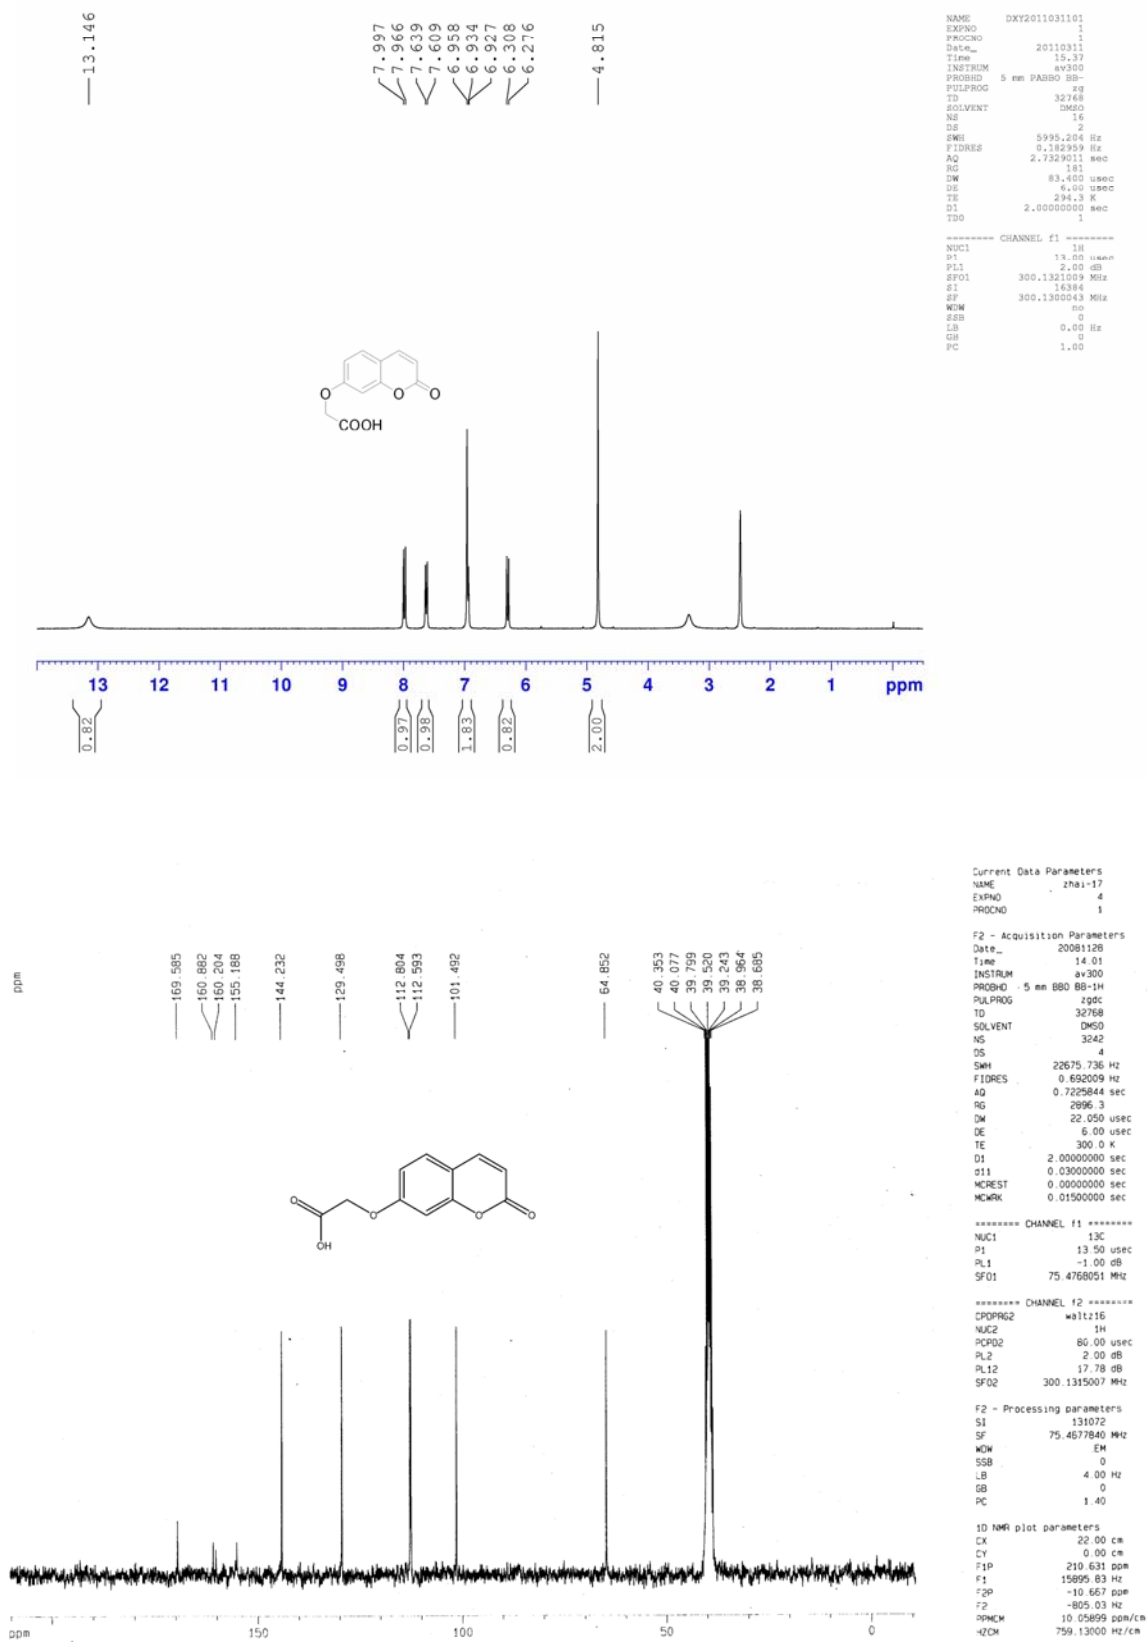

**Figure S8.**  $^1\text{H}$  NMR and  $^{13}\text{C}$  NMR spectra of **1b**

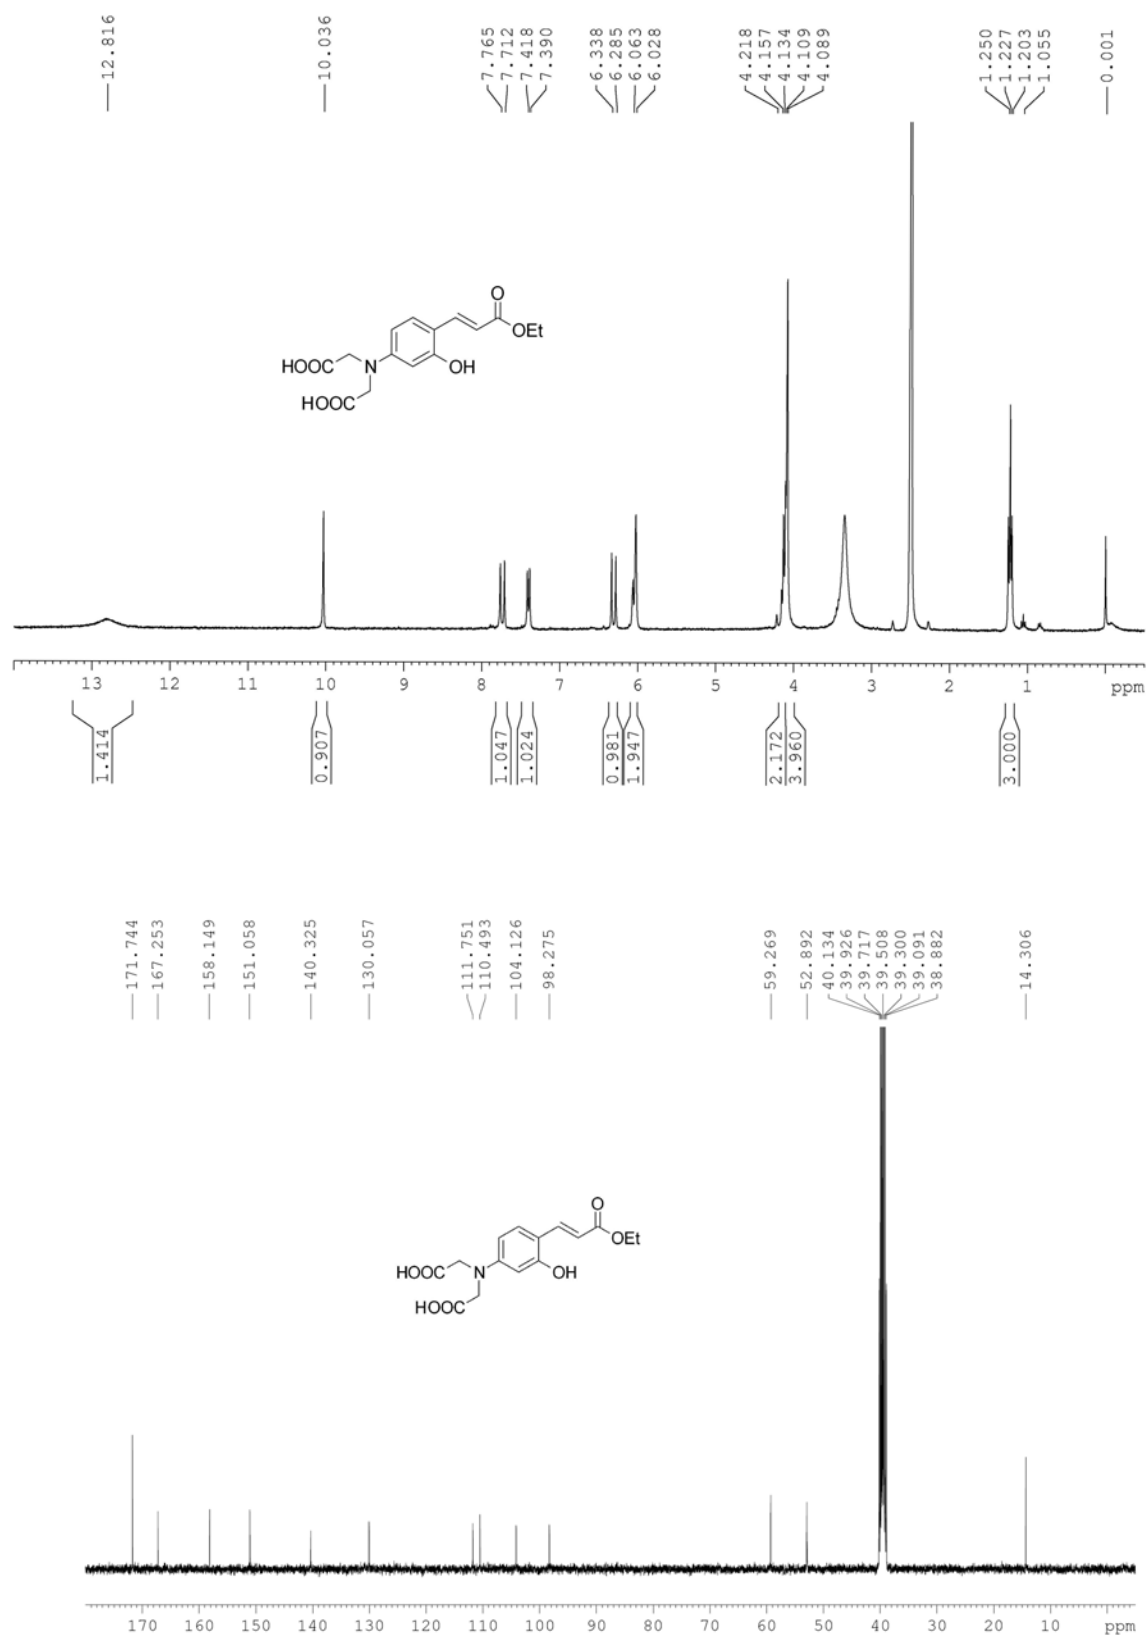



**Figure S9.**  $^1\text{H}$  NMR and  $^{13}\text{C}$  NMR spectra of **2b**

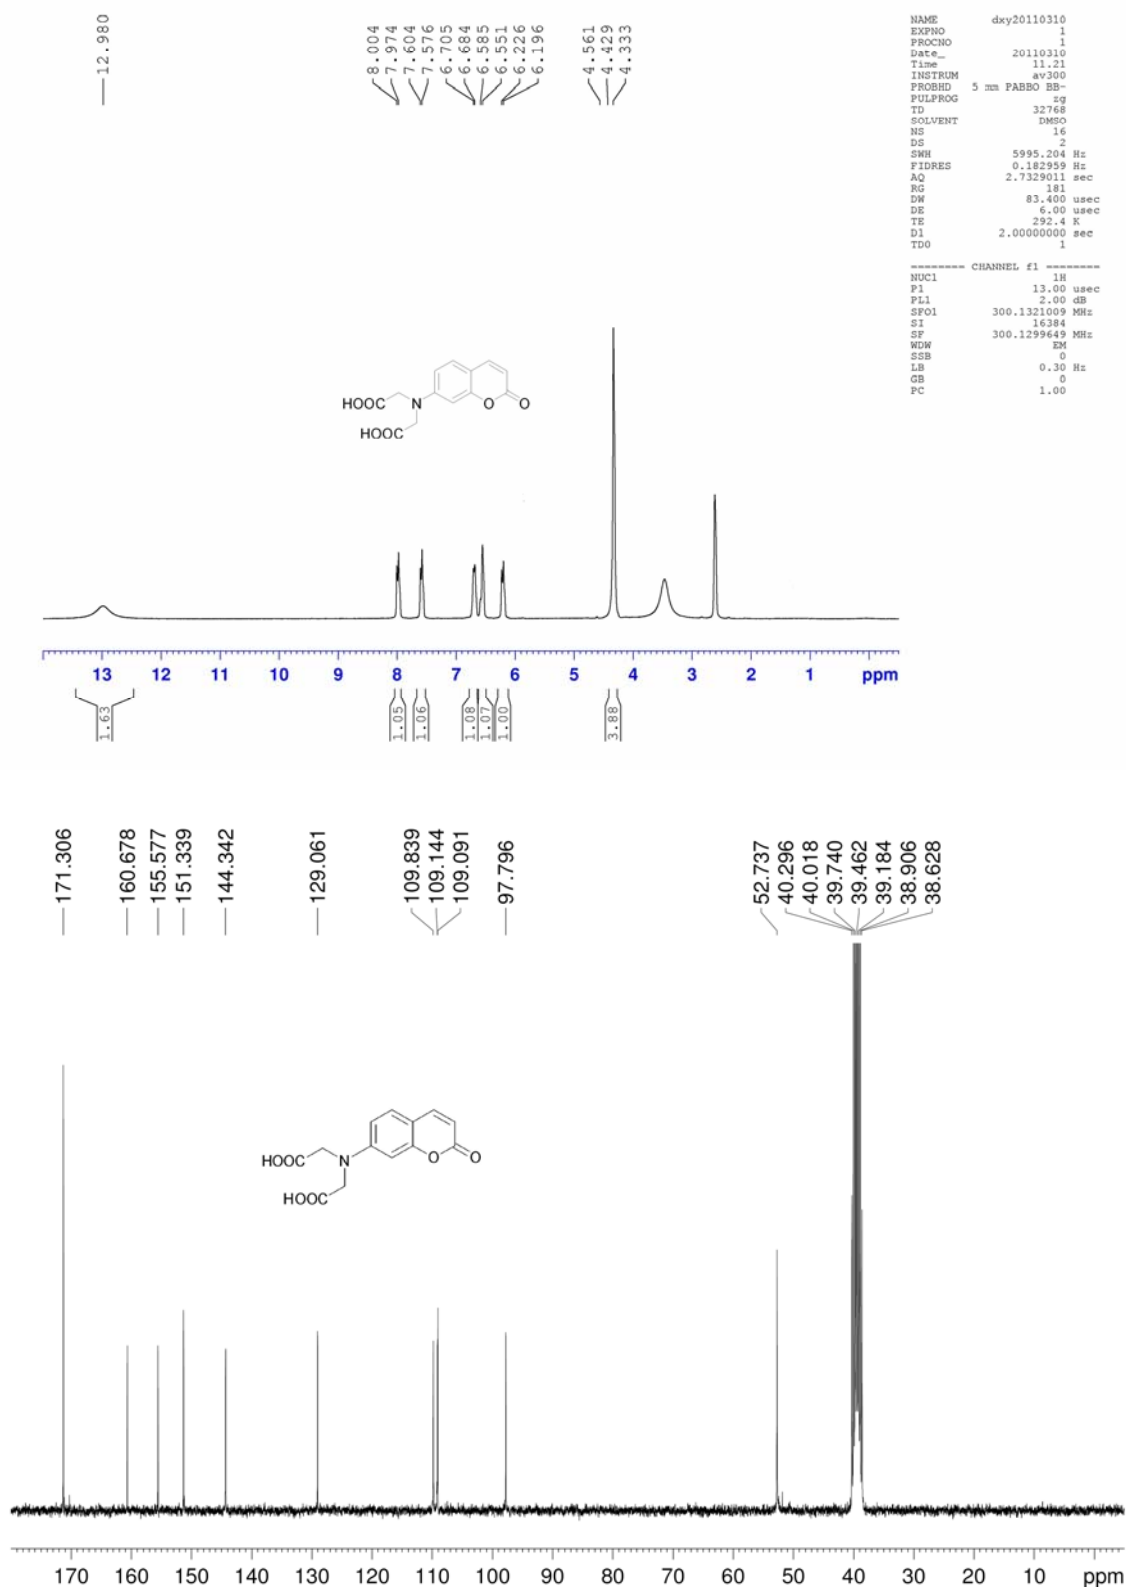

Supplement: c2pp05309h.pdf [file c2pp05309h.pdf]
